# Supplementary material for: Gender-based violence screening methods preferred by women visiting a public hospital in Pune, India
Source: PubMed Central journal article supplement (PMC5769341; doi:10.1186/s12905-018-0515-2), 2018-01-15
Supplement: 12905_2018_515_MOESM1_ESM.pdf [file 12905_2018_515_MOESM1_ESM.pdf]

## Gender-Based violence

PID:

1. What is your age?  Yrs.

2. Are you currently:

1. Deserted  2. Divorced  3. Married  4. Unmarried  5. Widowed  
 6. Refused to Answer

3. What is your mother tongue?

1. Marathi  2. Hindi  3. Other . \_\_\_\_\_

4. What is your family type?

1. Nuclear  2. Joint

5. How many years of education have you had?

01. None  02. Primary (1-4)  03. Secondary (6-10)  04. Higher (11+12)  
 05. College (13-16)  06. 16 above  66. Refused to answer

6. What is your occupation:

- Housewife  Unskilled manual worker  Professional  Skilled manual worker/farmer  
 Other (b. Specify \_\_\_\_\_ )

### Acceptability and knowledge of GBV support organizations

1. Are you aware of any organizations or individuals that exist to help women who have experienced abuse?

- a.  Yes  b. No

If yes: Name of organization 1. ....  
2. ....  
3. ....

*(Probe for legal support, police reporting, social support, safety planning)*

2. If yes, how comfortable are women in accessing those services?

- a. They hardly access those services   
b. They access services only if they have threat to their lives.   
c. They fear if they access the service they will face more violence   
d. Other.....



- .....  
 .....
8. Have you ever been hit, pushed, slapped, choked or otherwise physically hurt by your husband or someone you were in a sexual relationship with?  
 a.  Yes  b. No  
 8a. If yes, has this happened in the past 12 months?  
 a.  Yes  b. No
9. Have you ever had sex (vaginal, oral, or anal sex) when you didn't want to because your husband/partner insisted or pressured you in a way you felt you could not refuse, but didn't use force or threats? (Choose one)  
 a.  Yes  b. No  
 2a. If yes, has this happened in the past 12 months?  
 a.  Yes  b. No
10. Have you ever had sex (vaginal, oral, or anal sex) with your husband/partner when you didn't want to because your partner used force or threats?  
 a.  Yes b.  No  
 3a. If yes, has this happened in the past 12 months?  
 a.  Yes  b. No
11. Did you face any humiliation by your husband/partner in front of others?  
 a.  Yes b.  No  
 If yes, how many times this happened in the past 12 months?.....
12. I think it is helpful for health care providers to talk about healthy and unhealthy relationships, including violence, with patients.  
 a.  Strongly agree b.  Agree c.  Neutral d.  Disagree  
 e.  Strongly disagree
13. I would feel comfortable if my provider asked me about my relationships, including violence.  
 a.  Strongly agree b.  Agree c.  Neutral d.  Disagree  
 e.  Strongly disagree
14. Comments of Interviewer:  
 .....  
 .....  
 .....  
 .....  
 .....  
 .....
